# Supplementary material for: An electrochemical sensor modified with a molecularly imprinted polymer and carbon black for 17-β-estradiol detection
Source: Royal Society of Chemistry journal article supplement (doi:10.1039/d1ay02062e), 2022-01-01
Supplement: d1ay02062e1.pdf [file d1ay02062e1.pdf]

### Supplementary material

#### An electrochemical sensor modified with molecularly imprinted polymer and carbon black for 17- $\beta$ -estradiol detection

Daniela Nunes da Silva<sup>\*a</sup> and Arnaldo César Pereira<sup>a</sup>

<sup>a</sup>Departamento de Ciências Naturais, Universidade Federal de São João del Rei (UFSJ), Campus Dom Bosco, Praça Dom Helvécio 74, Fábricas, 36301-160, São João del Rei, MG, Brazil.

\*E-mail: [daniela.silva.quimica@gmail.com](mailto:daniela.silva.quimica@gmail.com)

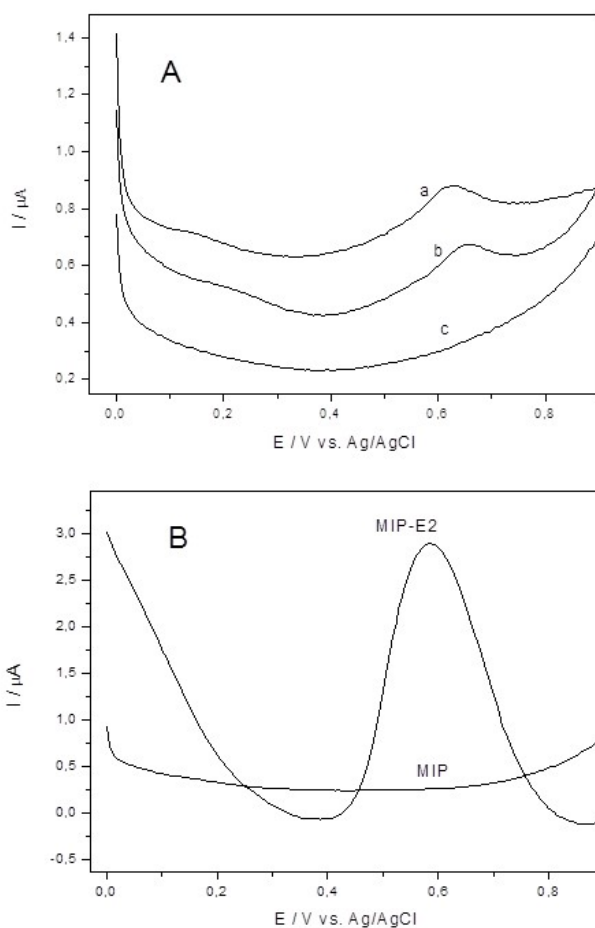

**Fig. 1.** Voltamograms obtained in the washing process; A) Supernatant after wash (a) 1st , (b) 3rd , (c) 14th; B) comparison between washed (MIP) and unwashed (MIP-E2) materials; Conditions: phosphate buffer solution 0.1 mol L<sup>-1</sup> pH 7

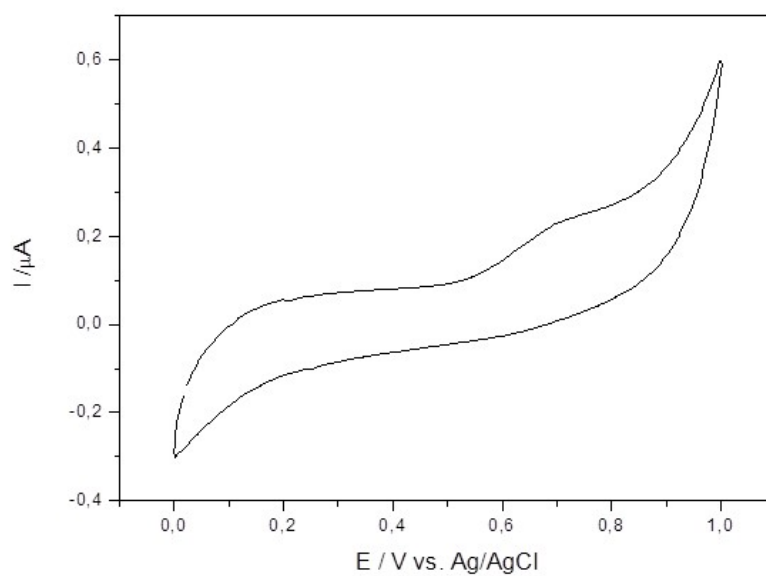

**Fig. 2.** Cyclic voltammogram ( $5 \text{ mV s}^{-1}$ ). Conditions: phosphate buffer solution  $0.1 \text{ mol L}^{-1}$  pH 7, in the presence of  $15 \text{ } \mu\text{mol L}^{-1}$  of E2.

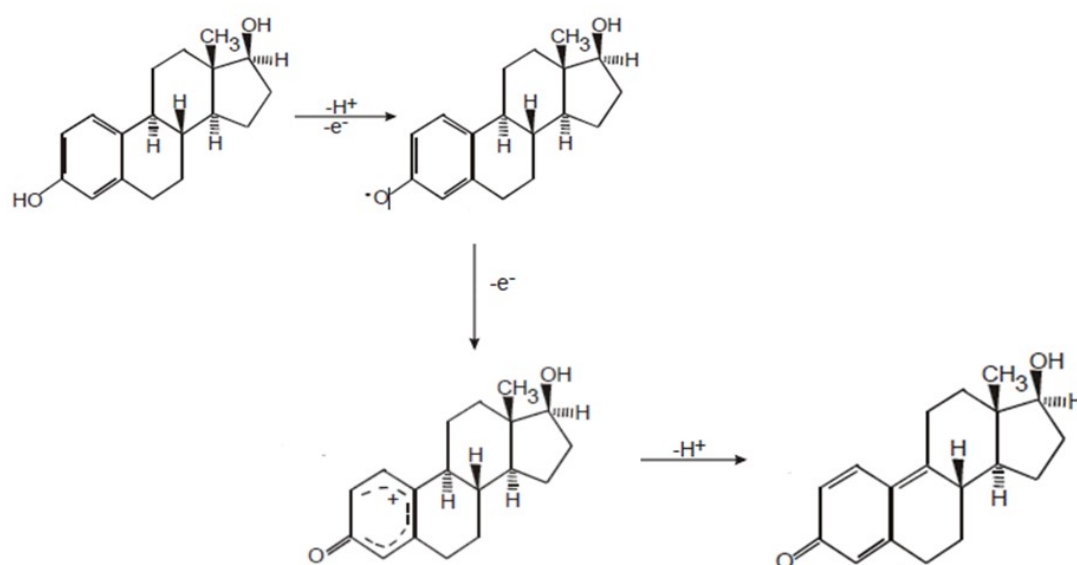

**Scheme 1.** Proposed reaction mechanism for the electrochemical oxidation of E2.
